# Supplementary material for: Perm1 regulates cardiac energetics as a downstream target of the histone methyltransferase Smyd1
Source: PubMed Central journal article supplement (PMC7310723; doi:10.1371/journal.pone.0234913), 2020-06-23

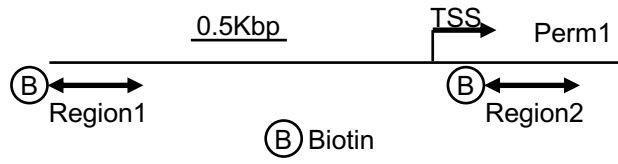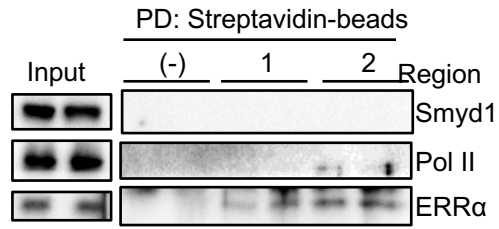

Supplement: pone.0234913.s002.pdf [file pone.0234913.s002.pdf]
