# Supplementary material for: Perm1 regulates cardiac energetics as a downstream target of the histone methyltransferase Smyd1
Source: PubMed Central journal article supplement (PMC7310723; doi:10.1371/journal.pone.0234913), 2020-06-23
Supplement: pone.0234913.s003.pdf [file pone.0234913.s003.pdf]

**S1 Table. Phenotypic Characteristics of C57BL Mice Subjected to Sham Treatment, Transverse Aortic Constriction (TAC)**

|             | <b>Sham<br/>(n=4)</b> | <b>TAC (4 weeks)<br/>(n=4)</b> |
|-------------|-----------------------|--------------------------------|
| Age, month  | 3.68 ± 0.49           | 4.22 ± 0.97                    |
| HR, bpm     | 464 ± 70              | 443 ± 73                       |
| LVEF, %     | 70.5 ± 6.1            | 40.3 ± 8.0*                    |
| LVFS, %     | 33.7 ± 4.6            | 15.9 ± 3.6*                    |
| LVEDD, mm   | 3.07 ± 0.46           | 3.77 ± 0.50*                   |
| LVESD, mm   | 1.98 ± 0.37           | 3.12 ± 0.52*                   |
| DSEP WT, mm | 0.87 ± 0.12           | 1.40 ± 0.32*                   |
| DP WT, mm   | 0.93 ± 0.15           | 1.01 ± 0.23                    |
| SSEP WT, mm | 1.15 ± 0.33           | 1.57 ± 0.38*                   |
| SP WT, mm   | 1.04 ± 0.20           | 1.11 ± 0.23                    |

HR, heart rate; LV, left ventricle; EF, ejection fraction, FS, fractional shortening; EDD, end-diastolic dimension; ESD, end-systolic dimension; DSEP, Diastolic septal; DP, Diastolic posterior; SSEP, systolic septal; SP, Systolic posterior; WT, wall thickness. Data are mean ± SD. \*P<0.05 vs pre-TAC (paired t test).
