# Supplementary material for: Perm1 regulates cardiac energetics as a downstream target of the histone methyltransferase Smyd1
Source: PubMed Central journal article supplement (PMC7310723; doi:10.1371/journal.pone.0234913), 2020-06-23
Supplement: pone.0234913.s004.pdf [file pone.0234913.s004.pdf]

**S2 Table. Clinical Data of the Study Population**

|                                       | <i>Donor (n=7)</i> | <i>Failing (n=10)</i> | <i>p-value</i> |
|---------------------------------------|--------------------|-----------------------|----------------|
| Age in years, median (range)          | 42 (31-69)         | 51 (27-65)            | 0.86           |
| Gender, male/female                   | 3/4                | 8/2                   |                |
| Ischemic cardiomyopathy, n            | n/a                | 6                     |                |
| Left ventricular ejection fraction, % | 64.7 ± 3.1         | 20 ± 24               | <0.05          |
| Cardiac index, L/min/m <sup>2</sup>   | 4.1 ± 0.4          | 1.9 ± 0.1             | <0.05          |
| Mean PAP, mm Hg                       | No data            | 34.1 ± 3.3            | n/a            |

PAP: pulmonary artery pressure
